# Supplementary material for: Should Lymph Nodes Be Retrieved in Patients with Intrahepatic Cholangiocarcinoma? A Collaborative Korea–Japan Study
Source: PubMed Central journal article supplement (PMC7865580; doi:10.3390/cancers13030445), 2021-01-25
Supplement: cancers-13-00445-s001.pdf [file cancers-13-00445-s001.pdf]

# Should Lymph Nodes Be Retrieved in Patients with Intrahepatic Cholangiocarcinoma? A Collaborative Korea–Japan Study

Chang Moo Kang, Kyung-Suk Suh, Nam-Joon Yi, Tae Ho Hong, Sang Jae Park, Keun Soo Ahn, Hiroki Hayashi, Sae Byeol Choi, Chi-Young Jeong, Takeshi Takahara, Shigehiro Shiozaki, Young Hoon Roh, Hee Chul Yu, Takumi Fukumoto, Ryusei Matsuyama, Uyama Naoki, Kazuki Hashida, Hyung Il Seo, Takehiro Okabayashi, Tomoo Kitajima, Sohei SATOI, Hiroaki Nagano, Hongbeom Kim, Kaoru Taira, Shoji Kubo and Dong Wook Choi

**Table S1.** Operative findings of patients with resected IHCC.

|                                   | Patients (N = 1138) |
|-----------------------------------|---------------------|
| Caudate Lobectomy                 |                     |
| No                                | 934 (82.4%)         |
| Yes                               | 200 (17.6%)         |
| Combined Resection                |                     |
| No                                | 383 (33.7%)         |
| Yes                               | 755 (66.3%)         |
| Detailed Combined Resected Organs |                     |
| Gallbladder                       | 695 (92.1%)         |
| Stomach                           | 4 (0.5%)            |
| Duodenum                          | 2 (0.3%)            |
| Right adrenal gland               | 6 (0.8%)            |
| Colon                             | 4 (0.5%)            |
| Small bowel                       | 2 (0.3%)            |
| Diaphragm                         | 15 (2.0%)           |
| Other                             | 27 (3.6%)           |
| Operation Time (min)              | 343.8 ± 147.3       |
| Intraoperative Blood Loss (ml)    | 915.9 ± 1085.4      |
| Intraoperative Transfusion        |                     |
| No                                | 659 (64.4%)         |
| Yes                               | 365 (35.6%)         |

**Table S2.** Pathologic findings of patients with resected IHCC.

| Mean ± SD                  | Patients (N = 1138) |
|----------------------------|---------------------|
| Radiologic tumor size (cm) | 4.9 ± 3.2           |
| Pathologic tumor size (cm) | 5.1 ± 3.0           |
| Retrieved lymph nodes      | 5.9 ± 8.3           |
| Metastatic lymph nodes     | 1.1 ± 2.5           |
| Gross type of tumor        |                     |
| Mass forming               | 872 (76.6%)         |
| Periductal infiltration    | 82 (7.2%)           |
| Intraductal growth type    | 115 (10.1%)         |
| Mixed                      | 69 (6.1%)           |
| Histopathologic grade      |                     |
| Well differentiated        | 186 (17.8%)         |
| Moderate differentiated    | 558 (53.3%)         |
| Poorly differentiated      | 264 (25.2%)         |
| Undifferentiated           | 38 (3.6%)           |
| Portal vein invasion       |                     |
| No                         | 907 (81.9%)         |
| Yes                        | 201 (18.1%)         |

| Mean ± SD                           | Patients (N = 1138) |
|-------------------------------------|---------------------|
| Hepatic artery invasion             |                     |
| No                                  | 1071 (96.7%)        |
| Yes                                 | 37 (3.3%)           |
| Lymphovascular invasion             |                     |
| No                                  | 604 (58.2%)         |
| Yes                                 | 434 (41.8%)         |
| Perineural invasion                 |                     |
| No                                  | 666 (68.4%)         |
| Yes                                 | 307 (31.6%)         |
| Resection margin status             |                     |
| R <sub>0</sub>                      | 1013 (89.0%)        |
| R <sub>1</sub>                      | 106 (9.3%)          |
| R <sub>2</sub>                      | 19 (1.7%)           |
| Distance from resection margin (mm) | 10.9 ± 14.3         |

**Table S3.** Topographic relationship between metastatic lymph nodes and primary tumor location of resected IHCC.

| Tumor Side        | Right-sided<br>(N = 112) | Left-sided<br>(N = 181) | <i>p</i> |
|-------------------|--------------------------|-------------------------|----------|
| No. 8 LN          |                          |                         | 0.121    |
| No                | 85 (75.9%)               | 122 (67.4%)             |          |
| Metastasis        | 27 (24.1%)               | 59 (32.6%)              |          |
| No. 9 LN          |                          |                         | 0.998    |
| No                | 104 (92.9%)              | 168 (92.8%)             |          |
| Metastasis        | 8 (7.1%)                 | 13 (7.2%)               |          |
| No. 16 LN         |                          |                         | 0.485    |
| No                | 100 (89.3%)              | 166 (91.7%)             |          |
| Metastasis        | 12 (10.7%)               | 15 (8.3%)               |          |
| Regional LN       |                          |                         | 0.751    |
| No                | 88 (78.6%)               | 145 (80.1%)             |          |
| Metastasis        | 24 (21.4%)               | 36 (19.9%)              |          |
| Peripancreatic LN |                          |                         | 0.860    |
| No                | 111 (99.1%)              | 179 (98.9%)             |          |
| Metastasis        | 1 (0.9%)                 | 2 (1.1%)                |          |

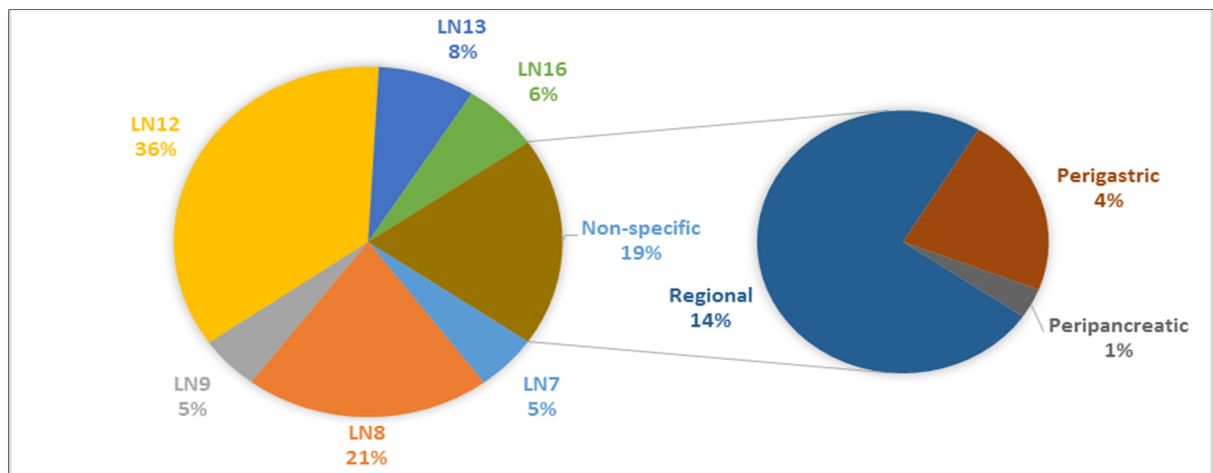

(a)

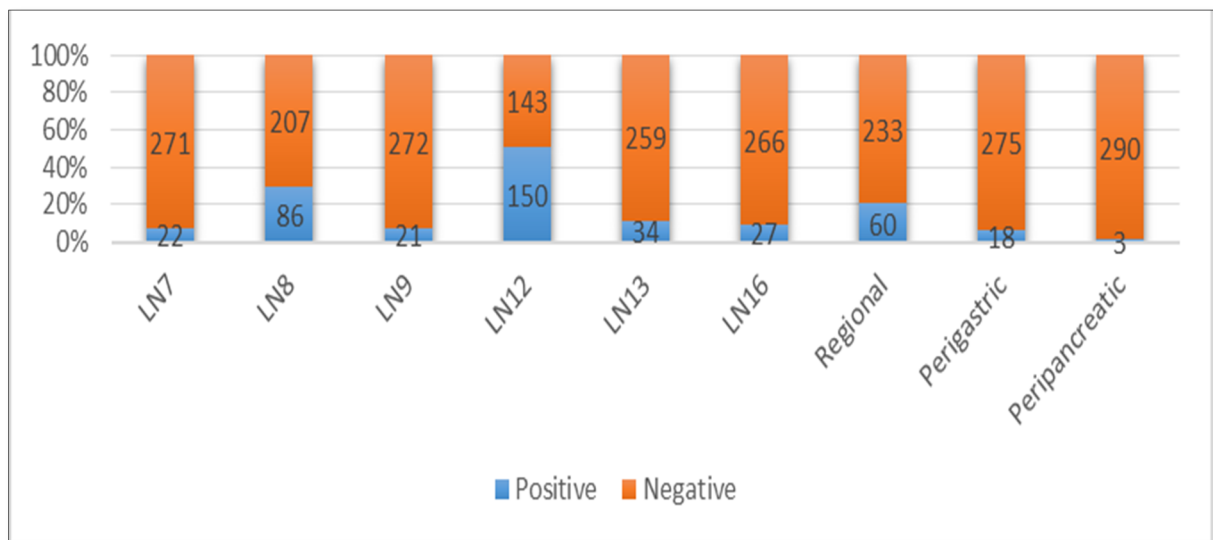

(b)

**Figure S1.** Status of metastatic and retrieved lymph nodes in resected IHCC. (a) Location of metastatic lymph nodes in IHCC (b) Proportion of metastatic lymph nodes according to the location of retrieved lymph nodes.

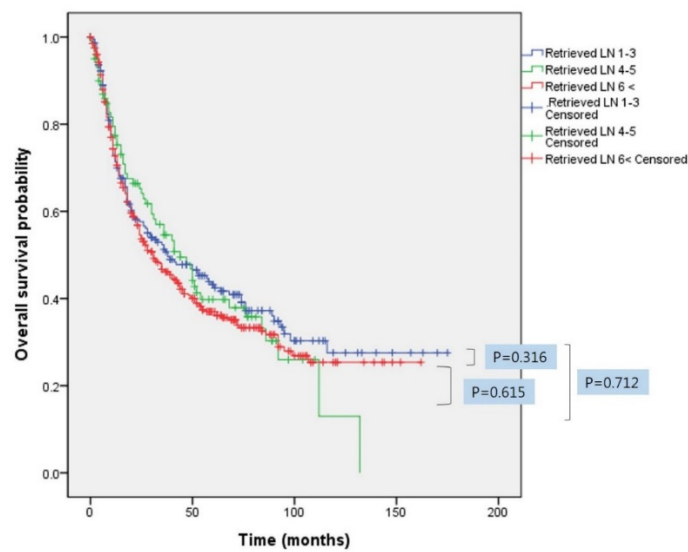

Figure S2. Overall impact of the number of retrieved lymph nodes in patients with resected IHCC.

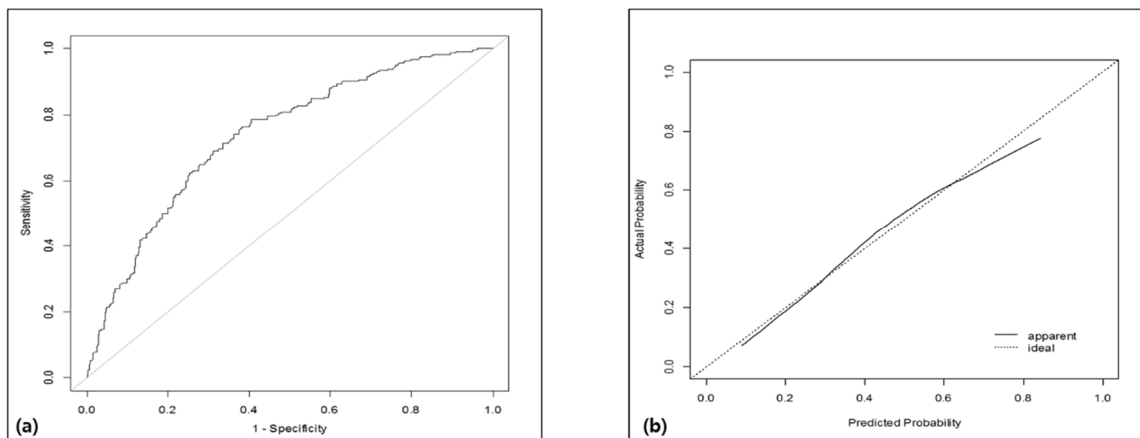

Figure S3. Accuracy of developed nomogram to preoperatively predict lymph node metastasis in patients with resected IHCC. (a) Internal validation of the nomogram. (b) Performance of the nomogram in the primary cohort.

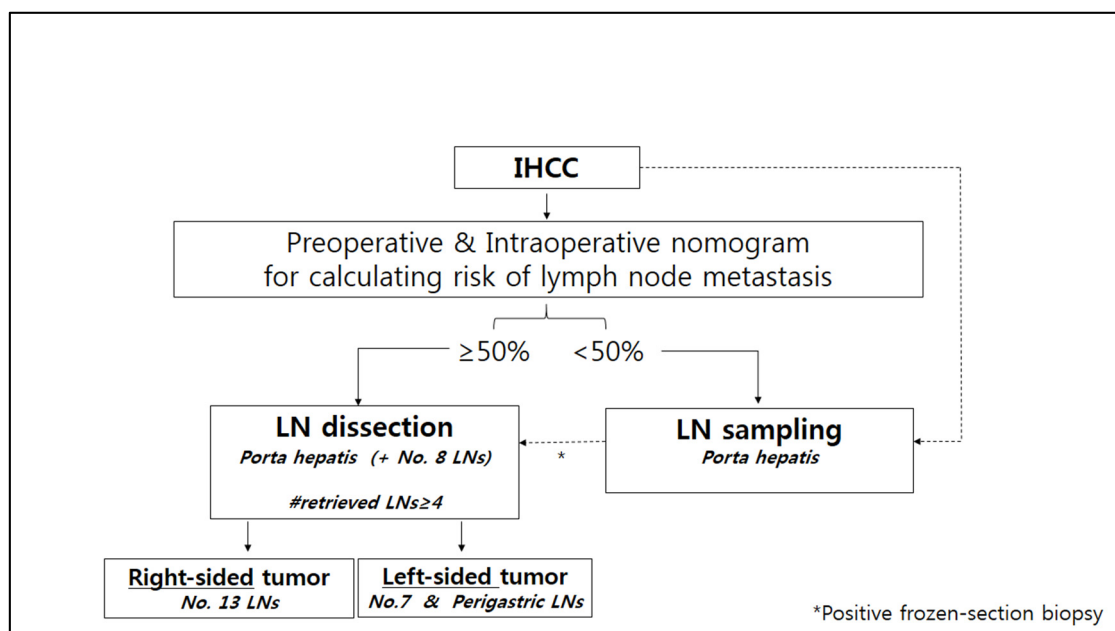

**Figure S4.** Proposal for case-specific surgical management of lymph nodes in treating IHCC.
